# Supplementary material
Source: publisher site journal article supplement (https://www.dovepress.com/article/363670)
Supplement: Supplementary file 1 [file get_supplementary_file.php]

## Appendix 1

### Norwegian nurses' attitudes towards assisted dying: A cross-sectional study

Definitions on assisted dying and questionnaire translated from Norwegian to English.

A Dutch definition in an edited form is applied on assisted dying:

*Euthanasia* is defined as an act with a physician intentionally killing a person by injecting drugs, at that person's voluntary and competent request. *Physician-assisted suicide* is conducted by a physician who intentionally helps a person to commit suicide by providing drugs for self-administration, at that person's voluntary and competent request. (Griffiths J, Weyers H, Adams M, editors. *Euthanasia and Law in Europe*. Oxford: Hart Publishing; 2008). These definitions are used in NOBAS (Magelssen et al. 2015)

Example on euthanasia: to inject a lethal injection on the patient's incitement.

Example on physician-assisted suicide: facilitating medication so that the patient can swallow or inject the medication himself.

Questions 1-8: Norwegian Bioethics Attitude Survey (NOBAS) (Magelssen et al. 2015).

Questions 9-15: added in this study.

| Please consider the following statements:                                                                                         | Strongly disagree | Somewhat disagree | Neither agree or Disagree | Somewhat agree | Strongly agree | Total n=205     |
|-----------------------------------------------------------------------------------------------------------------------------------|-------------------|-------------------|---------------------------|----------------|----------------|-----------------|
| 1. Physician-assisted suicide should be allowed for persons who have a terminal illness with short life expectancy                | 60<br>(30%)       | 12<br>(6%)        | 16<br>(8%)                | 65<br>(32%)    | 49<br>(24%)    | n=202<br>(100%) |
| 2. Euthanasia should be allowed for persons who have a terminal illness with short life expectancy                                | 66<br>(32%)       | 28<br>(9%)        | 22<br>(11%)               | 56<br>(28%)    | 42<br>(21%)    | n=204<br>(100%) |
| 3. Assisted dying should also be allowed for persons who have an incurable chronic disease but who are not dying                  | 83<br>(41%)       | 32<br>(16%)       | 29<br>(14%)               | 41<br>(20%)    | 20<br>(10%)    | n=205<br>(100%) |
| 4. Assisted dying should be allowed for persons who have a mental illness                                                         | 120<br>(59%)      | 41<br>(20%)       | 27<br>(13%)               | 11<br>(5%)     | 3<br>(2%)      | n=202<br>(100%) |
| 5. Assisted dying should be allowed for persons who do not suffer from serious illness, but who are tired of life and want to die | 150<br>(74%)      | 30<br>(15%)       | 15<br>(7%)                | 8<br>(4%)      | 1<br>(1%)      | n=204<br>(100%) |
| 6. The legalization of assisted dying may result in weak groups experiencing pressure to request for assisted dying               | 25<br>(12%)       | 24<br>(12%)       | 32<br>(16%)               | 74<br>(36%)    | 49<br>(24%)    | n=204<br>(100%) |
| 7. Instead of allowing assisted dying, we should develop and expand the provision of palliative care to the dying                 | 7<br>(3%)         | 14<br>(7%)        | 29<br>(14%)               | 44<br>(22%)    | 111<br>(54%)   | n=205<br>(100%) |

|                                                                                                                       |             |             |             |             |              |                 |
|-----------------------------------------------------------------------------------------------------------------------|-------------|-------------|-------------|-------------|--------------|-----------------|
| 8. Treatment limitation can sometimes be the right decision, to avoid a distressing prolongation of the dying process | 4<br>(2%)   | 2<br>(1%)   | 6<br>(3%)   | 28<br>(14%) | 164<br>(80%) | n=204<br>(100%) |
| 9. I would have used the reservation right if assisted suicide was legal in Norway                                    | 34<br>(17%) | 30<br>(15%) | 38<br>(19%) | 33<br>(16%) | 70<br>(34%)  | n=205<br>(100%) |
| 10. I would have used the reservation right if euthanasia was legal in Norway                                         | 32<br>(16%) | 27<br>(13%) | 38<br>(18%) | 33<br>(16%) | 76<br>(37%)  | n=206<br>(100%) |
| 11. I discuss with other nurses' cases where the patient wants assisted suicide                                       | 40<br>(20%) | 19<br>(9%)  | 60<br>(29%) | 56<br>(28%) | 29<br>(14%)  | n=204<br>(100%) |
| 12. I discuss with other nurses' cases where the patient wants euthanasia                                             | 38<br>(19%) | 24<br>(12%) | 64<br>(32%) | 49<br>(24%) | 28<br>(14%)  | n=203<br>(100%) |
| 13. I discuss with physicians' cases where the patient wants assisted suicide                                         | 44<br>(22%) | 22<br>(11%) | 66<br>(33%) | 35<br>(17%) | 35<br>(17%)  | n=202<br>(100%) |
| 14. I discuss with physicians' cases where the patient wants euthanasia                                               | 45<br>(22%) | 23<br>(11%) | 67<br>(33%) | 37<br>(18%) | 32<br>(16%)  | n=204<br>(100%) |
| 15. Have you received a request for help in dying from a terminally ill?                                              | Yes         | No          |             |             |              |                 |
